# Supplementary material for: High and selective sorption of C2 hydrocarbons in heterometal–organic frameworks built from tetrahedral units
Source: Royal Society of Chemistry journal article supplement (doi:10.1039/c4ra13058h), 2014-12-10
Supplement: c4ra13058h1.pdf [file c4ra13058h1.pdf]

# High and Selective Sorption of C<sub>2</sub> Hydrocarbons in Heterometal-Organic Frameworks Built from Tetrahedral Units

Yan-Xi Tan, Yan-Ping He and Jian Zhang\*

*State Key Laboratory of Structural Chemistry, Fujian Institute of Research on the Structure of Matter, Chinese Academy of Sciences, Fuzhou, Fujian 350002, P. R. China. E-mail: [zhj@fjirsm.ac.cn](mailto:zhj@fjirsm.ac.cn)*

## Experimental Section

**General Procedures.** All reagents were purchased commercially and used without further purification. All Powder X-ray diffraction (PXRD) analyses were recorded on a Rigaku Dmax2500 diffractometer with Cu K $\alpha$  radiation ( $\lambda = 1.54056 \text{ \AA}$ ) with a step size of  $0.05^\circ$ . Thermal stability studies were carried out on a NETSCHZ STA-449C thermoanalyzer with a heating rate of  $10 \text{ }^\circ\text{C}/\text{min}$  under an N<sub>2</sub> atmosphere. Gas adsorption measurement was performed in the ASAP (Accelerated Surface Area and Porosimetry) 2020 System. Nonlinear optical (NLO) properties were measured by Kurtz–Perry powder SHG test using an Nd:YAG laser (1064 nm) with an input pulse of 350 mV.

**Synthesis of [AgIn(na)<sub>4</sub>] $\cdot$ 1.5DMF (1):** Hna (246 mg, 2 mmol), AgNO<sub>3</sub> (85 mg, 0.5 mmol) and In(NO<sub>3</sub>)<sub>3</sub> (150 mg, 0.5 mmol) were dissolved in 8 mL DMF, which were placed in a 20 mL vial. The mixture was heated at  $100 \text{ }^\circ\text{C}$  for 12 hours, and then cooled to room temperature. Colorless block crystals of the product were formed and collected by filtration and washed with DMF several times (Yield: 220 mg, 55%, based on Hna).

**Synthesis of [CuIn(na)<sub>4</sub>] $\cdot$ 1.5DMF (2):** The procedure was the same as that for **1** except that AgNO<sub>3</sub> was replaced by CuI. Yellow block crystals of **2** were obtained in 10% yield based on Hna.

**X-ray Crystallographic Study:** The diffraction data for compounds were collected on an Oxford Xcalibur diffractometer equipped with a graphite–monochromatized Mo-K $\alpha$  radiation ( $\lambda = 0.71073 \text{ \AA}$ ) at 293(2) K. Crystal data for **1**: C<sub>24</sub>H<sub>16</sub>N<sub>4</sub>O<sub>8</sub>AgIn,  $M = 711.10$ , orthorhombic,  $a = 10.8851(12) \text{ \AA}$ ,  $b = 11.8615(10) \text{ \AA}$ ,  $c = 13.9326(10) \text{ \AA}$ ,  $\beta = 90.000^\circ$ ,  $V = 1798.9(3) \text{ \AA}^3$ ,  $T =$

293(2) K, space group  $I222$ ,  $Z = 2$ , 2661 reflections measured, 1923 independent reflections ( $R_{int} = 0.0600$ ). The final  $R_I$  value was 0.0612 ( $I > 2\sigma(I)$ ). The final  $wR(F^2)$  value was 0.1564 ( $I > 2\sigma(I)$ ). The goodness of fit on  $F^2$  was 1.053. Crystal data for **2**:  $C_{24}H_{16}N_4O_8CuIn$ ,  $M = 666.78$ , monoclinic,  $a = 11.1032(6)$  Å,  $b = 11.1032(6)$  Å,  $c = 13.8084(9)$  Å,  $\beta = 90.000^\circ$ ,  $V = 1702.31(17)$  Å<sup>3</sup>,  $T = 293(2)$  K, space group  $I-42m$ ,  $Z = 2$ , 2031 reflections measured, 957 independent reflections ( $R_{int} = 0.0432$ ). The final  $R_I$  value was 0.0391 ( $I > 2\sigma(I)$ ). The final  $wR(F^2)$  value was 0.1207 ( $I > 2\sigma(I)$ ). The goodness of fit on  $F^2$  was 1.199. The structures were solved by the direct method and refined by the full-matrix least-squares on  $F^2$  using the SHELXTL-97 program. The SQUEEZE routine of the PLATON software suite was used to remove the highly disordered solvent molecules of compounds **1** and **2**.

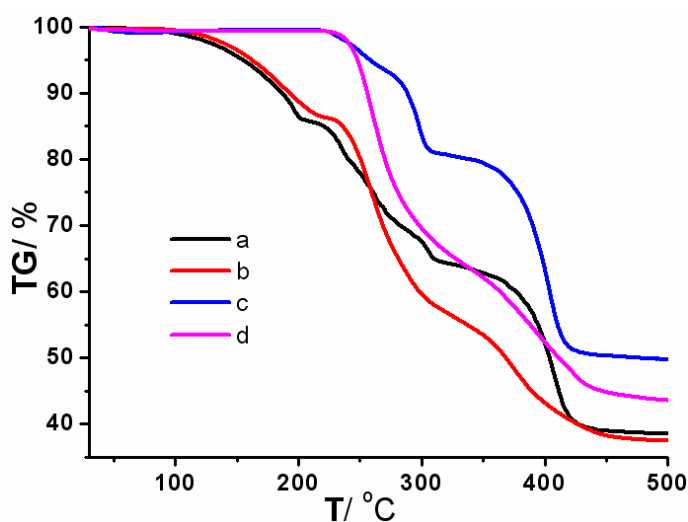

Figure S1. TGA curves of **1** (a), **2** (b), **1a** (a) and **2a** (b).

The TGA of **1** was performed under  $N_2$  atmosphere with a heating rate of  $10$  °C/min in the temperature range  $30$ – $500$  °C. As shown in Figure S1a, **1** shows a weight loss of  $13.8$  % in the temperature range of  $225$ – $440$  °C, corresponding to the release of  $1.5$  DMF molecules per unit cell. Further weight loss of  $47.1\%$  is observed at ca.  $440$  °C, owing to the decomposition of the inorganic ligands. Finally, the residue of  $38.7\%$  may be the  $In_2O_3$  and  $Ag_2O$  powder. The similar weight losses can be seen in the TGA curves of **2**. The TGA curves of **1a** and **2a** indicate the complete withdrawal of guest after heating  $CH_2Cl_2$ -exchanged **1** and **2** under high vacuum at  $60$  °C for 24 hours.

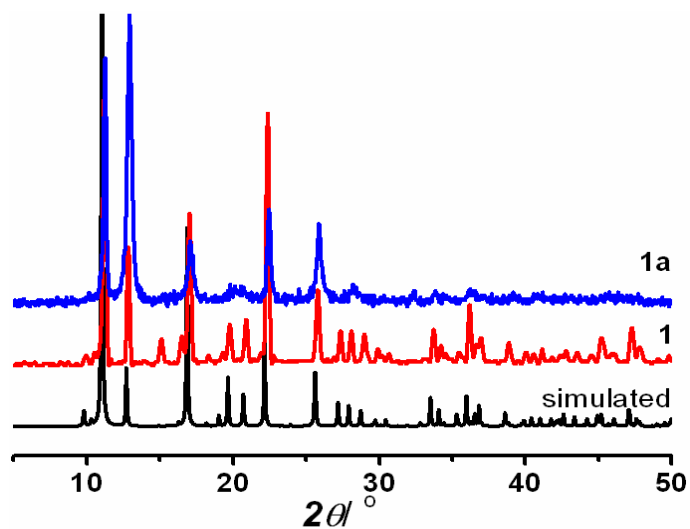

Figure S2. The PXR D patterns of simulated one (a), 1 and 1a

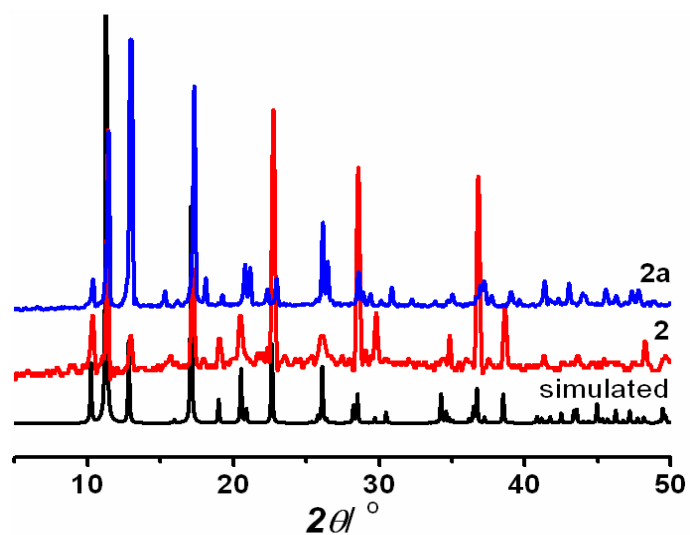

Figure S3. The PXR D patterns of simulated one (a), 2 and 2a

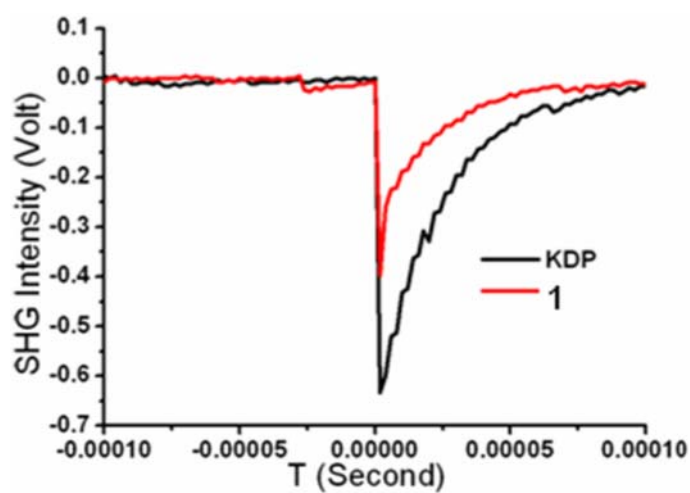

Figure S4. Comparison of the measured SHG response of 1 with that of KDP

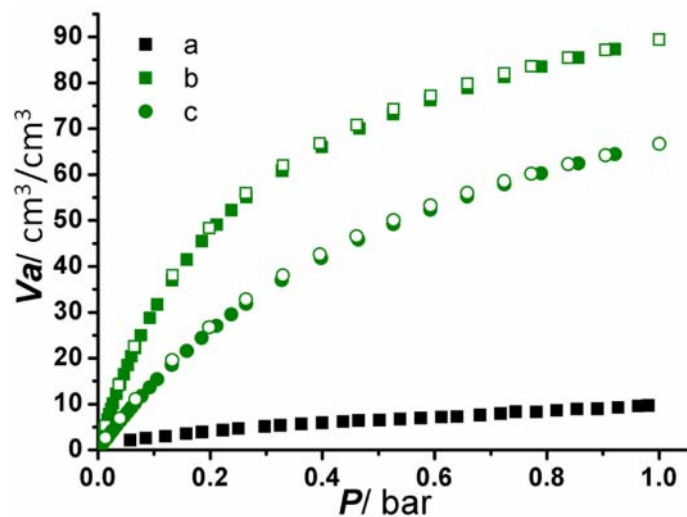

Figure S5. Gas sorption isotherms for **2a**: N<sub>2</sub> at 77 K (a), CO<sub>2</sub> at 273 K (b) and 298 K (c).

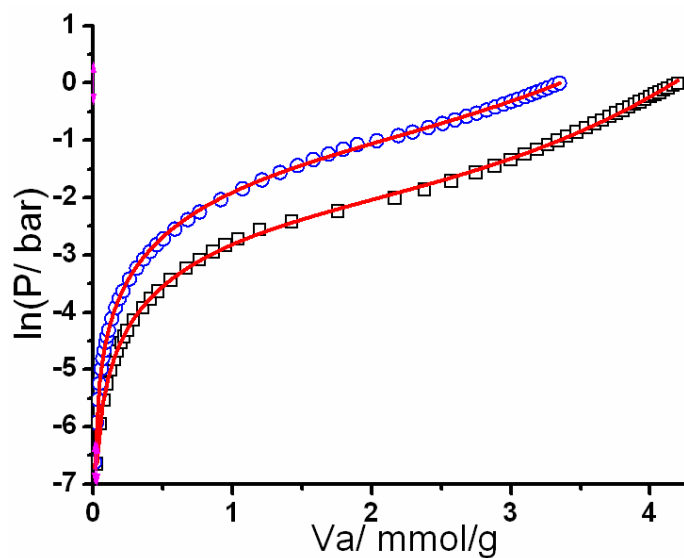

Figure S6. CO<sub>2</sub> adsorption isotherms for **1a** fitting by virial method.

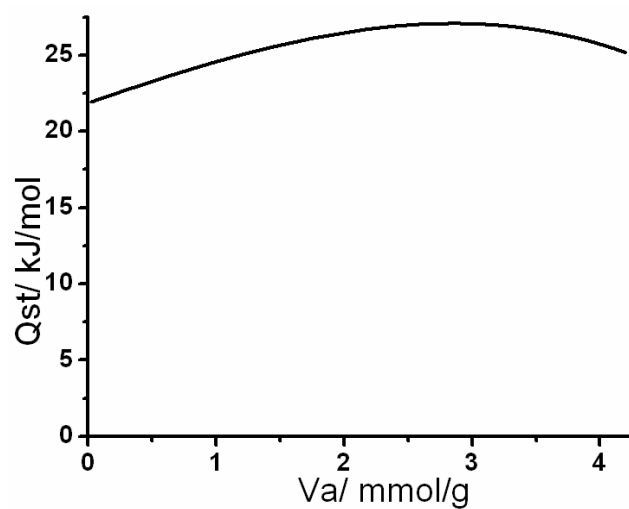

Figure S7. The isosteric heat of CO<sub>2</sub> adsorption for **1a** estimated by the virial equation.

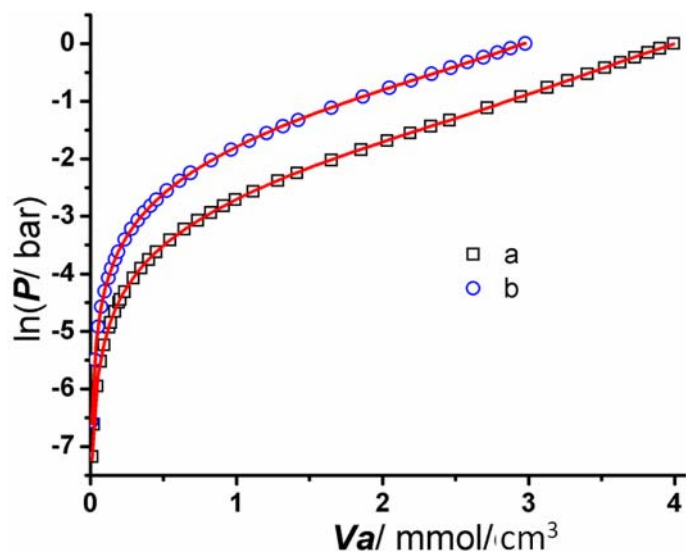

Figure S8. CO<sub>2</sub> adsorption isotherms for **2a** fitting by virial method.

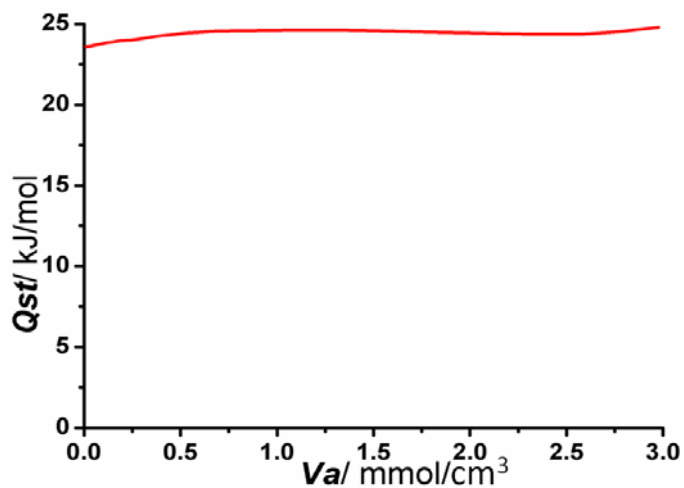

Figure S9. The isosteric heat of CO<sub>2</sub> adsorption for **2a** estimated by the virial equation.

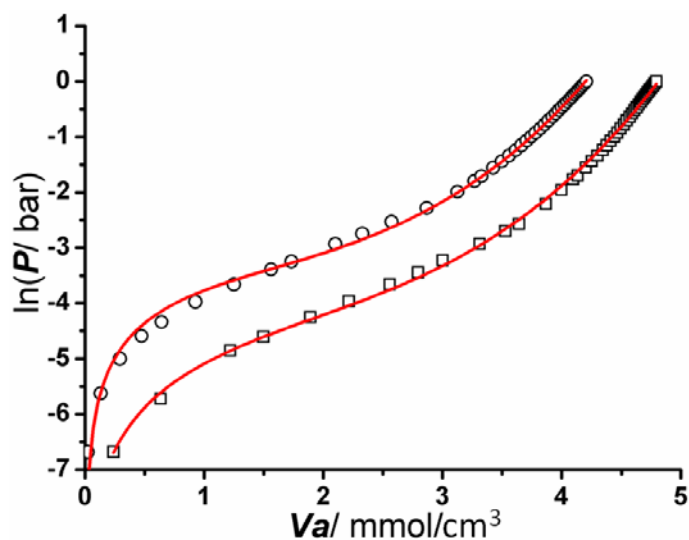

Figure S10. C<sub>2</sub>H<sub>6</sub> adsorption isotherms for **1a** fitting by virial method.

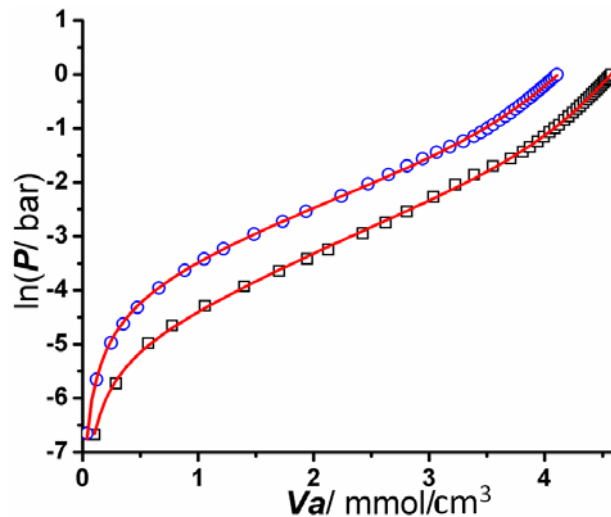

Figure S11. C<sub>2</sub>H<sub>4</sub> adsorption isotherms for **1a** fitting by virial method.

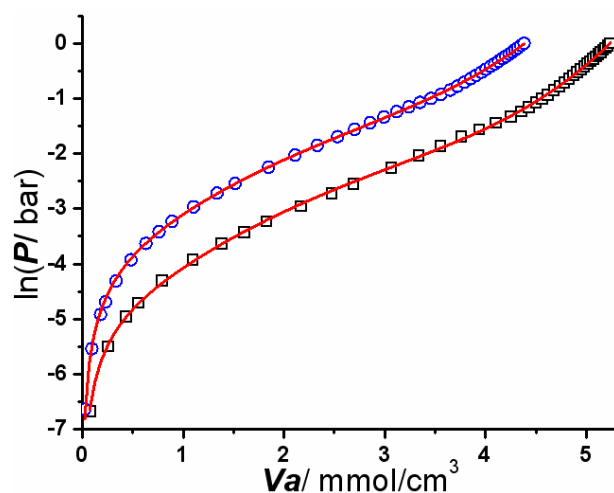

Figure S12. C<sub>2</sub>H<sub>2</sub> adsorption isotherms for **1a** fitting by virial method.

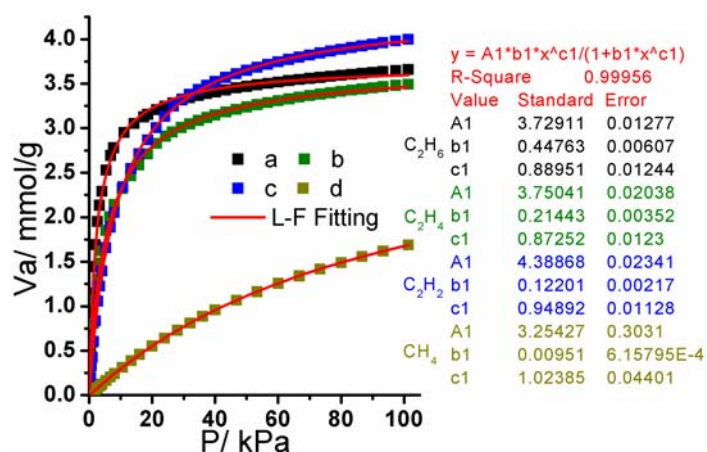

Figure S13. Adsorption isotherms for C<sub>2</sub>H<sub>6</sub> (a), C<sub>2</sub>H<sub>4</sub> (b), C<sub>2</sub>H<sub>2</sub> (c) and CH<sub>4</sub> (d) in **1a** at 273 K. Solid lines through the experimental data are fits to the dual-site Langmuir-Freundlich model.
